# Supplementary material for: DNA Barcoding Bromeliaceae: Achievements and Pitfalls
Source: PLoS One. 2012 Jan 5;7(1):e29877. doi: 10.1371/journal.pone.0029877 (PMC3252331; doi:10.1371/journal.pone.0029877)
Supplement: Table S2 — Accession codes of matK sequences downloaded from GenBank, belonging to three angiosperm families. (XLS) [file pone.0029877.s002.xls]

## Sheet: Sheet1
Families	Asteraceae	Bromeliaceae	Orchidaceae
Accession NO.	AB008758	AF162227.2	EU214135
	AB008759	AF162228.2	EU214136
	AB008760	AF162230.2	EU214137
	AB008761	AF162231.2	EU214138
	AB008762	AF162232.2	EU214139
	AB032388	AF162234.2	EU214140
	AB032389	AF162235.2	EU214141
	AB032390	AF162237.2	EU214142
	AB032391	AF162239.2	EU214143
	AB032392	AF162242.2	EU214144
	AB032394	AF162249.2	EU214145
	AB032787	AF162254.2	EU214146
	AB032788	AF162255.2	EU214147
	AB032789	AF162260.2	EU214148
	AB032790	AF162265.2	EU214149
	AB032791	AF539960.2	EU214150
	AB032793	AF539961.2	EU214151
	AB032794	AF539965.2	EU214152
	AB032795	AF539967.2	EU214153
	AB032796	AF539974.2	EU214154
	AB032891	AF539978.2	EU214155
	AB032892	AF539979.2	EU214156
	AB032893	AF542580	EU214157
	AB032895	AM114726	EU214158
	AB032896	AY614015	EU214159
	AB032897	AY614016	EU214160
	AB033152	AY614017	EU214161
	AB033153	AY614018	EU214162
	AB033156	AY614019	EU214163
	AB033157	AY614020	EU214164
	AB033158	AY614021	EU214165
	AB118140	AY614022	EU214166
	AB118141	AY614023	EU214167
	AB118142	AY614024	EU214168
	AB118143	AY614025	EU214169
	AB118144	AY614026	EU214170
	AB118145	AY614027	EU214171
	AB118146	AY614028	EU214172
	AB118147	AY614029	EU214173
	AB118148	AY614030	EU214174
	AB118149	AY614031	EU214175
	AB118150	AY614032	EU214176
	AB118151	AY614033	EU214177
	AB118152	AY614034	EU214178
	AB118153	AY614035	EU214179
	AB118154	AY614036	EU214180
	AB196615	AY614037	EU214181
	AB196616	AY614038	EU214182
	AB196617	AY614039	EU214183
	AB196618	AY614040	EU214184
	AB196619	AY614041	EU214185
	AB196620	AY614042	EU214186
	AB196621	AY614043	EU214187
	AB196622	AY614044	EU214188
	AB196623	AY614045	EU214189
	AB196624	AY614046	EU214190
	AB196625	AY614047	EU214191
	AB196626	AY614048	EU214192
	AB196627	AY614049	EU214193
	AB196628	AY614050	EU214194
	AB196629	AY614051	EU214195
	AB196630	AY614052	EU214196
	AB196631	AY614053	EU214197
	AB196632	AY614054	EU214198
	AB217689	AY614055	EU214199
	AB217690	AY614056	EU214200
	AB217691	AY614057	EU214201
	AB217692	AY614058	EU214202
	AB262014	AY614059	EU214203
	AB262015	AY614060	EU214204
	AB262016	AY614061	EU214214
	AB262017	AY614062	EU214215
	AB262018	AY614063	EU214216
	AB262019	AY614064	EU214217
	AB262020	AY614065	EU214239
	AB262021	AY614066	EU214305
	AB262022	AY614067	EU214306
	AB262023	AY614068	EU214307
	AB262024	AY614069	EU214308
	AB262025	AY614070	EU214309
	AB262026	AY614071	EU214310
	AB262027	AY614072	EU214311
	AB262028	AY614073	EU214312
	AB262029	AY614074	EU214313
	AB262030	AY614075	EU214314
	AB262031	AY614076	EU214315
	AB262032	AY614077	EU214316
	AB262033	AY614078	EU214317
	AB262034	AY614079	EU214318
	AB262035	AY614080	EU214319
	AB262036	AY614081	EU214320
	AB262037	AY614082	EU214321
	AB262038	AY614083	EU214322
	AB262039	AY614084	EU214323
	AB262040	AY614085	EU214324
	AB262041	AY614086	EU214325
	AB262042	AY614087	EU214326
	AB262043	AY614088	EU214327
	AB262044	AY614089	EU214328
	AB262045	AY614090	EU214329
	AB262046	AY614091	EU214330
	AB436843	AY614092	EU214331
	AB436844	AY614093	EU214332
	AB436845	AY614094	EU214333
	AB436846	AY614095	EU214334
	AB436847	AY614096	EU214335
	AB436848	AY614097	EU214336
	AB436849	AY614098	EU214337
	AB436850	AY614099	EU214338
	AB436851	AY614100	EU214339
	AB436852	AY614101	EU214340
	AB436853	AY614102	EU214341
	AB436854	AY614103	EU214342
	AB436855	AY614104	EU214343
	AB436856	AY614105	EU214344
	AB436857	AY614106	EU214345
	AB436858	AY614107	EU214346
	AB436859	AY614108	EU214347
	AB436860	AY614109	EU214348
	AB436861	AY614110	EU214349
	AB436862	AY614111	EU214350
	AB436863	AY614112	EU214351
	AB436864	AY614113	EU214352
	AB436865	AY614114	EU214353
	AB436866	AY614115	EU214354
	AB436867	AY614116	EU214355
	AB436869	AY614117	EU214356
	AB436870	AY614118	EU214357
	AB436873	AY614119	EU214358
	AB436874	AY614120	EU214359
	AB436875	AY614121	EU214360
	AB436876	AY614122	EU214361
	AB436877	AY614123	EU214362
	AB436878	AY614124	EU214363
	AB436879	AY614125	EU214364
	AB436880	AY614126	EU214365
	AB436881	AY614127	EU214366
	AB436882	AY614128	EU214367
	AB436883	AY614129	EU214368
	AB436884	AY614130	EU214369
	AB436885	AY614131	EU214370
	AB436886	AY614132	EU214371
	AB436887	AY614133	EU214372
	AB436888	AY614134	EU214373
	AB436889	AY949990	EU214374
	AB436890	AY949991	EU214375
	AB436891	AY949992	EU214376
	AB436892	AY949993	EU214377
	AB436893	AY949994	EU214378
	AB436895	AY949995	EU214379
	AB436896	AY949996	EU214380
	AB457331	AY949997	EU214381
	AB457332	AY949998	EU214382
	AB457333	AY949999	EU214383
	AB457334	AY950000	EU214384
	AB457335	AY950001	EU214385
	AB457336	AY950002	EU214386
	AB457337	AY950003	EU214387
	AB457338	AY950004	EU214388
	AB457339	AY950005	EU214389
	AB457340	AY950006	EU214390
	AB457341	AY950007	EU214391
	AB457342	AY950008	EU214392
	AB457343	AY950009	EU214393
	AB457344	AY950010	EU214394
	AB457345	AY950011	EU214395
	AB457346	AY950012	EU214396
	AB457347	AY950013	EU214397
	AB457348	AY950014	EU214398
	AB457349	AY950015	EU214399
	AB457350	AY950016	EU214400
	AB457351	AY950017	EU214401
	AB457352	AY950018	EU214402
	AB457353	AY950019	EU214403
	AB457354	AY950020	EU214404
	AB457355	AY950021	EU214405
	AB457356	AY950022	EU214406
	AB457357	AY950023	EU214407
	AB457358	AY950024	EU214408
	AB457359	AY950025	EU214409
	AB457360	AY950026	EU214410
	AB457361	AY950027	EU214411
	AB457362	AY950028	EU214412
	AB457363	AY950029	EU214413
	AB457364	AY950030	EU214414
	AB457365	AY950031	EU214415
	AB457366	AY950032	EU214416
	AB457367	AY950033	EU214417
	AB457368	AY950034	EU214418
	AB457369	AY950035	EU214419
	AB457370	AY950036	EU214420
	AB457371	AY950037	EU214421
	AB457372	AY950038	EU214422
	AB457373	AY950039	EU214423
	AB457374	AY950040	EU214424
	AB457375	AY950041	EU214425
	AB457376	AY950042	EU214426
	AB457377	AY950043	EU214427
	AB457378	AY950044	EU214428
	AB457379	AY950045	EU214429
	AB457380	AY950046	EU214430
	AB457381	AY950047	EU214431
	AB457382	AY950048	EU214432
	AF151442	AY950049	EU214433
	AF151443	AY950050	EU214434
	AF151452	AY950051	EU214435
	AF151454	AY950052	EU214436
	AF151455	AY950053	EU214437
	AF151473	AY950054	EU214438
	AF151482	AY950055	EU214439
	AF151487	AY952422	EU214440
	AF151490	EU681833	EU214441
	AF151496	EU681834	EU214442
	AF528403	EU681835	EU214443
	AF528404	EU681836	EU214444
	AF528405	EU681837	EU214445
	AF528406	EU681838	EU214446
	AF528407	EU681839	EU214447
	AF528408	EU681840	EU214448
	AF528409	EU681841	EU214449
	AF528410	EU681842	EU214450
	AF528411	EU681843	EU214452
	AF528412	EU681844	EU214453
	AF528413	EU681845	EU214454
	AF528414	EU681846	EU214455
	AF528415	EU681847	EU214456
	AF528416	EU681848	EU214457
	AF528417	EU681849	EU214458
	AF528418	EU681850	EU214459
	AF528419	EU681851	EU214460
	AF528420	EU681852	EU214461
	AF528421	EU681853	EU214462
	AF528422	EU681854	EU214463
	AF528423	EU681855	EU214464
	AF528424	EU681856	EU214465
	AF528425	EU681857	EU214466
	AF528426	EU681858	EU214467
	AF528427	EU681859	EU214468
	AF528428	EU681860	EU214469
	AF528429	EU681861	EU214470
	AF528430	EU681862	EU214471
	AF528431	EU681863	EU214472
	AJ307041	EU681864	EU214473
	AJ429380	EU681865	EU214474
	AM411125	EU681866	EU214475
	AM411126	EU681867	EU214476
	AM411127	EU681868	EU214477
	AM411130	EU681869	EU214478
	AM411131	EU681870	EU214479
	AM411132	EU681871	EU214480
	AM411133	EU681872	EU214481
	AM411134	EU681873	EU214482
	AM411135	EU681874	EU214483
	AY009457	EU681875	EU214484
	AY009458	EU681876	EU214485
	AY009459	EU681877	EU214486
	AY009460	EU681878	EU214487
	AY009461	EU681879	EU214488
	AY009462	EU681880	EU214489
	AY009463	EU681881	EU214490
	AY009464	EU681882	EU214491
	AY009465	EU681883	EU214492
	AY009466	EU681884	EU214493
	AY009467	EU681885	EU214494
	AY215765	EU681886	EU214495
	AY215768	EU681887	EU214496
	AY215804	EU681888	EU214497
	AY215805	EU681889	EU214498
	AY215812	EU681890	EU214500
	AY215839	EU681891	EU214501
	AY215843	EU681892	EU214502
	AY215865	EU681893	EU214503
	AY297643	EU681894	EU214504
	AY297644	EU681895	EU214505
	AY297645	EU681896	EU214506
	AY297646	EU681897	EU214507
	AY297647	EU681898	EU214508
	AY297648	EU681899	EU214509
	AY297649	EU681900	EU214510
	AY297650	EU681901	EU214511
	AY297651	EU681902	EU214512
	AY297652	EU681903	EU214513
	AY297653	EU681904	EU214514
	AY551475	EU681905	EU214515
	AY551477	EU681906	EU214516
	AY551478	EU681907	EU214517
	AY551480	EU681908	EU214518
	AY551481	EU681909	EU214519
	AY551482	EU681910	EU214520
	AY551483	EU681911	EU214521
	AY551484	EU681912	EU214522
	AY551485	EU681913	EU214523
	AY551486	EU681914	EU214524
	AY551487	EU681915	EU214525
	AY551488	EU681916	EU214526
	AY551489	EU681917	EU214527
	AY551490	EU681918	EU214528
	AY551491	EU681919	EU214529
	AY551492	EU681920	EU214530
	AY551493	EU681921	EU301497
	AY551494	EU681922	EU301498
	AY551495	EU681923	EU301499
	AY551496	EU780842	EU301500
	AY551497	EU780843	EU301501
	AY551498	EU780844	EU301502
	AY551499	EU780845	EU301503
	AY551500	EU780846	EU301504
	AY551501	EU780847	EU301505
	DQ022963	EU780848	EU301506
	DQ022964	EU780849	EU301507
	DQ022965	EU780850	EU301508
	DQ022966	EU780851	EU301509
	DQ022967	EU780852	EU301510
	DQ022968	EU780853	EU301512
	DQ022969	FJ968163	EU301513
	DQ022970	FJ968164	EU301514
	DQ022971	FJ968165	EU301515
	DQ022972	FJ968166	EU301516
	DQ022973	FJ968167	EU301517
	DQ022974	FJ968168	EU301518
	DQ022975	FJ968169	EU301519
	DQ022976	FJ968170	EU301521
	DQ022977	FJ968171	EU301522
	DQ022978	FJ968172	EU301523
	DQ022979	FJ968173	EU301524
	DQ022980	FJ968174	EU301525
	DQ022981	FJ968175	EU301526
	DQ022982	FJ968176	EU301528
	DQ022983	FJ968177	EU301529
	DQ022984	FJ968178	EU301530
	DQ022985	FJ968179	EU301531
	DQ022986	FJ968180	EU301532
	DQ022987	FJ968182	EU301533
	DQ022988	FJ968183	EU301534
	DQ022989	FJ968184	EU301535
	DQ022990	FJ968185	EU301536
	DQ022991	FJ968186	EU301537
	DQ022992	FJ968187	EU301538
	DQ022993	FJ968188	EU301539
	DQ022994	FJ968189	EU301540
	DQ022995	FJ968190	EU301541
	DQ022996	FJ968191	EU301542
	DQ022997	FJ968192	EU301543
	DQ022998	FJ968193	EU301544
	DQ022999	FJ968194	EU301545
	DQ023000	FJ968195	EU301546
	DQ023001	FJ968196	EU301547
	DQ023002	FJ968197	EU301548
	DQ023003	FJ968198	EU301549
	DQ023004	FJ968199	EU687535
	DQ023005	FJ968200	EU687536
	DQ023006	FJ968201	EU687537
	DQ023007	FJ968202	EU687538
	DQ023008	FJ968203	EU687539
	DQ023009	FJ968204	GQ248091
	DQ023010	FJ968205	GQ248092
	DQ023011	FJ968206	GQ248112
	DQ023012	FJ968207	GQ248114
	DQ023013	FJ968208	GQ248115
	DQ023014	FJ968209	GQ248117
	DQ023015	FJ968210	GQ248118
	DQ023016	FJ968211	GQ248169
	DQ023017	FJ968212	GQ248170
	DQ023018	FJ968213	GQ248194
	DQ023019	FJ968214	GQ248195
	DQ023020	FJ968215
	DQ023021	FJ968216
	DQ023022	FJ968217
	DQ023023	FJ968218
	DQ023024	FJ968219
	DQ023025	FJ968220
	DQ023026	FJ968221
	DQ023027	FJ968222
	DQ023028	FJ968223
	DQ023029	FJ968224
	DQ023030	FJ968225
	DQ023031	FJ968226
	DQ023032	FJ968227
	DQ023033	FJ968228
	DQ023034	FJ968229
	DQ023035	FJ968230
	DQ023036	FJ968231
	DQ023037	FJ968232
	DQ507979	FJ968233
	DQ507980	FJ968234
	DQ507981	FM210787
	DQ507982	FM210788
	DQ507983	FM210789
	DQ507985	FM210790
	DQ507986	FM210791
	DQ507987	FM210792
	DQ507988	FM210793
	DQ507989	FM210794
	DQ507990	FM210795
	DQ507991	FM210796
	DQ507992	FM210797
	DQ507993	FM956430
	DQ507994	FM956431
	DQ507995	FM956432
	DQ507996	FM956433
	DQ507997	FM956434
	DQ507998	FM956435
	DQ507999	FM956436
	DQ508000	FM956437
	DQ508001	FM956438
	DQ508002	FM956439
	DQ508003	FM956440
	DQ508004	FM956441
	DQ508005	FM956442
	DQ508006	FM956443
	DQ508007	FM956444
	DQ508008	FM956445
	DQ508009	FM956446
	DQ508011	FM956447
	DQ508012	FM956448
	DQ508013	FM956449
	DQ508014	FM956450
	DQ508015	FM956451
	DQ508016	FM956452
	DQ508017	FM956453
	DQ508018	FM956454
	DQ840426	FN550871
	DQ840427
	DQ840428
	DQ840429
	DQ840430
	DQ840432
	DQ840433
	DQ840434
	DQ840435
	DQ840436
	DQ840437
	DQ840438
	DQ840439
	DQ840441
	DQ840442
	DQ840443
	DQ840444
	DQ840445
	DQ840446
	DQ840447
	DQ840448
	DQ840449
	DQ840450
	DQ840451
	DQ840452
	DQ840454
	EU049338
	EU049344
	EU049345
	EU049346
	EU049347
	EU049351
	EU049352
	EU049353
	EU049354
	EU049355
	EU049356
	EU049357
	EU049358
	EU049360
	EU049361
	EU049362
	EU049363
	EU049364
	EU049365
	EU053651
	EU053652
	EU337046
	EU337047
	EU337048
	EU337049
	EU337050
	EU337051
	EU337052
	EU337053
	EU337054
	EU337055
	EU337056
	EU337057
	EU385315
	EU385316
	EU385317
	EU385318
	EU385319
	EU385320
	EU385321
	EU385322
	EU385323
	EU385324
	EU385325
	EU385327
	EU385328
	EU385329
	EU385330
	EU385331
	EU385332
	EU385333
	EU385334
	EU385335
	EU385336
	EU385337
	EU385338
	EU385339
	EU385340
	EU385341
	EU385344
	EU385346
	EU385347
	EU385348
	EU385349
	EU385350
	EU385351
	EU385352
	EU385353
	EU385354
	EU385355
	EU385356
	EU385357
	EU385358
	EU385359
	EU385360
	EU385361
	EU385362
	EU385363
	EU385364
	EU385365
	EU385366
	EU385367
	EU385368
	EU385369
	EU385370
	EU385371
	EU385372
	EU385373
	EU385374
	EU385376
	EU385377
	EU385378
	EU385379
	EU385380
	EU385381
	EU385382
	EU385383
	EU385385
	EU385386
	EU385387
	EU385388
	EU385389
	EU385390
	EU385391
	EU385392
	EU385393
	EU385394
	EU385395
	EU385396
	EU385397
	EU385398
	EU385399
	EU385400
	EU385401
	EU385402
	EU385403
	EU385404
	EU385405
	EU385407
	EU385408
	EU385409
	EU529711
	EU529712
	EU529713
	EU529714
	EU529715
	EU529716
	EU529717
	EU841316
	EU841317
	EU841318
	EU841319
	EU841320
	EU841321
	EU841322
	EU841323
	EU841324
	EU841325
	EU841326
	EU841327
	EU841328
	EU841330
	EU841332
	EU841333
	EU841335
	EU841337
	EU841338
	EU841339
	EU841345
	EU841346
	EU841347
	EU841348
	EU841349
	EU841350
	EU841351
	EU841352
	EU841353
	EU841354
	EU841355
	EU841357
	EU841361
	EU841362
	EU841363
	EU841365
	FJ395377
	FJ395428
	FJ697074
	FJ697075
	FJ697076
	FJ697077
	FJ697078
	FJ697079
	FJ697080
	FJ697081
	FJ697082
	FJ697083
	FJ697084
	FJ697085
	FJ697086
	FJ697087
	FJ697088
	FJ697089
	FJ697090
	FJ697091
	FJ697092
	FJ697093
	FJ697094
	FJ697095
	FJ697096
	FJ697097
	FJ697098
	FJ697099
	FJ697100
	FJ697101
	FJ697102
	FJ697103
	FJ697104
	FJ697105
	FJ697106
	FJ697107
	FJ697108
	FJ697109
	FJ697110
	FJ697111
	FJ697112
	FJ697113
	FJ697114
	FJ697115
	FJ697116
	FJ697117
	FJ697118
	FJ697119
	FJ697120
	FJ697121
	FJ697122
	FJ697123
	FJ697124
	FJ697125
	FJ697126
	FJ697127
	FJ697128
	FJ697129
	FJ697130
	FJ697131
	FJ697132
	FJ697133
	FJ697134
	FJ697135
	FJ697136
	FJ697137
	FJ697139
	FJ697140
	FJ697141
	FJ697142
	FJ697143
	FJ697144
	FJ697145
	FJ697146
	FJ697147
	FJ697148
	FJ697149
	FJ697150
	FJ697151
	FJ697152
	FJ697153
	FJ697154
	FJ697155
	FJ697156
	FJ697157
	FJ697158
	FJ697159
	FJ697160
	FJ697161
	FJ697162
	FJ697163
	FJ697164
	FJ697165
	FJ789803
	FN668453
	FN668454
	FN668455
	FN668456
	FN668457
	FN668458
	GQ434113
	GQ434115
	GQ890332
	GQ890333
	GQ890334
	GU109304
	GU109305
	GU109306
	GU109307
	GU109308
	GU109309
	GU109310
	GU109313
	GU109314
	GU109315
	HM445594
	HM445595
	HM445596
	HM445597
	HM445598
	HM445599
	HM445600
	HM445601
	HM445602
	HM445603
	HM445604
	HM445605
	HM445606
	HM445607
	HM445608
	HM445609
	HM445610
	HM445611
	HM445612
	HM445613
	HM445614
	HM445615
	HM445616
	HM445617
	HM445621
	HM445622
	HM445623
	HM445624
	HM445625
	HM445626
	HM445627
	HM445628
	HM445629
	HM445630
	HM445631
	HM445632
	HM445633
	HM445634
	HM445635
	HM445636
	HM445637
	HM445638
	HM445639
	HM445640
	HM445641
	HM445642
	HM445643
	HM445645
	HM445648
	HM445649
	HM445651
	HM445652
